# Supplementary material for: Community structures and Taphonomic controls on benthic foraminiferal community from an Antarctic Fjord (Edisto Inlet, Victoria Land)
Source: Copernicus journal article supplement (doi:10.5194/egusphere-2025-5204), 2025-11-24
Supplement: Supplementary file 7 [file SupMat.docx]

**Supplement to “Taphonomic controls on benthic foraminiferal community from an Antarctic Fjord (Edisto Inlet, Victoria Land)”**

**
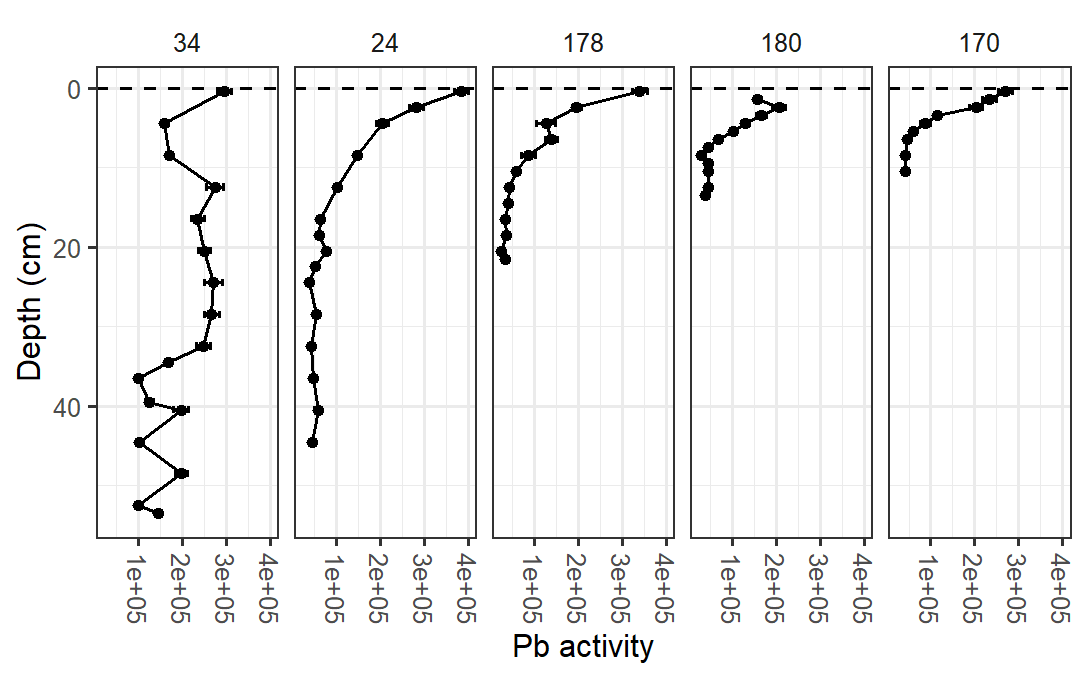
210Pb activity**

**Figure S1.** Activity profiles from the sediment’s cores analysed in this study, going from the inner to the outermost parts. Notice the shape of 34, indicative of a non-usable profile to derive ages and sedimentation rates.

**Taxonomical species list**

**Agglutinated forms (In alphabetical order):**

*Adercotryma glomeratum,* (Brady, 1878)

*Ammodiscus incertus,* (d’Orbigny, 1839)

*Ammomarginulina ensis,* (Wiesner, 1931)

*Ammovertellina* sp*.* (Suleymanov, 1959)

*Cribrostomoides jeffreysii,* (Williamson, 1858)

*Cystammina pauciloculata,* (Brady, 1879)

*Eggerelloides* sp., (Haynes, 1973)

*Glomospira charoides*, (Jones and Parker, 1860)

*Hormosinella guttifer* (Brady, 1881)

*Hormosinella ovicula,* (Brady, 1878)

*Lagenammina difflugiformis,* (Brady, 1879)

*Lagennammina* spp*.,* (Rhumbler, 1911)

*Miliammina arenacea,* (Chapman, 1916)

*Nodulina dentaliniformis,* (Brady, 1881)

*Paratrochammina bartrami,* (Hedley, Hurdle, & Burdett, 1967)

*Paratrochammina tricamerata,* (Earland, 1934)

*Portratrochammina antarctica,* (Parr, 1950)

*Psammosphaera fusca,* (Schulze, 1875)

*Pseudobolivina antarctica,* (Wiesner, 1931)

*Pseudobulimina chapmani,* (Heron-Allen & Earland, 1922)

*Pseudotrochammina* sp.,(Frerichs, 1969)

*Recurvoides* spp., (Earland, 1934)

*Recurvoides contortus,* (Earland, 1934)

*Reophax scorpiurus,* (Montfort, 1808)

*Reophax subfusiformis,* (Earland, 1933)

*Reophax* sp. (Montfort, 1808)

*Rhabdammina* sp. (Carpenter, 1869)

*Rhumblerella* sp. (Brönniman, 1981)

*Saccamina* sp. (Carpenter, 1869)

*Spiroplectammina bifomis* (Parker & Jones, 1865)

*Trochammina* sp. (Parker & Jones, 1859)

**Calcareous forms (In alphabetical order):**

*Ioanella tumida,* (Brady, 1884)

*Astrononion anctarticus,* (Parr, 1950)

*Bolivineellina pseudopunctata* (Höglund, 1947)

*Cassidulinoides porrecta,* (Heron-Allen & Earland, 1932)

*Cibicides refulgens,* (Montfort, 1808)

*Cibicides* sp., (Montfort, 1808)

*Cornuspira planorbis,* (Schultze, 1854)

*Ehrenbergina glabra,* (Heron-Allen & Earland, 1922)

*Epistominella exigua* (Brady, 1984)

*Fissurina earlandii* (Parr, 1950)

*Fissurina laevigata,* (Reuss, 1850)

*Fursenkoina subacuta,* (d’Orbigny, 1852)

*Globocasssidulina biora,* (Crespin, 1960)

*Globocasssidulina sublogobosa,* (Brady, 1881)

*Globocassidulina* spp., (Voloshinova, 1960)

*Hyalinonetrion gracilium,* (Seguenza, 1862)

*Hopkinsina* cf. *pacifica,* (Cushman, 1933)

*Lagena substriata,* (Williamson, 1848)

*Melonis affinis,* (Reuss, 1851)

*Nonionella iridea,* (Heron-Allen & Earland, 1932)

*Oolina hexagona,* (Williamson, 1848)

*Parafissurina fusiformis,* (Wiesner, 1931)

*Pullenia quinqueloba,* (Reuss, 1851)

*Pullenia subcarinata,* (d’Orbigny, 1839)

*Pyrgo depressa,* (d’Orbigny, 1826)

*Pyrgo elongata,* (d’Orbigny, 1826)

*Pyrgo williamsoni,* (Silvestri, 1923)

*Robertina arctica,* (d’Orbigny, 1846)

*Robertinoides* spp., (Höglund, 1947)

*Rosalina globularis,* (d’ Orbigny, 1826)

*Quinqueloculina seminulum* (Linnaeus, 1758)

*Quinqueloculina* sp., (d’Orbigny, 1826)

*Stainforthia concava,* (Höglund, 1947)

*Stainforthia feylingi,* (Knudsen & Seidenkrantz, 1994)

*Subfischerina* sp., (McCulloch, 1977)

*Trifarina angulosa*, (Williamson, 1858)

*Triloculina tricarinata,* (d’Orbigny in Deshayes, 1832)

*Usbekistania* sp., (Suleymanov, 1960)
